# Supplementary material for: Ultrafast, cost-effective and scaled-up recycling of aramid products into aramid nanofibers: mechanism, upcycling, closed-loop recycling
Source: Royal Society of Chemistry journal article supplement (doi:10.1039/d1gc01805a), 2021-01-01
Supplement: d1gc01805a1.pdf [file d1gc01805a1.pdf]

# Ultrafast, Cost-Effective and Scaling-Up Recycling of Aramid Products into Aramid Nanofibers: Mechanism, Upcycling, Closed-Loop Recycling

Hui-Jun Chen, Qi-Yao Bai, Mei-Cheng Liu, Gang Wu\* and Yu-Zhong Wang

Collaborative Innovation Center for Eco-Friendly and Fire-Safety Polymeric Materials (MoE), State

Key Laboratory of Polymer Materials Engineering, National Engineering Laboratory of Eco-

Friendly Polymeric Materials (Sichuan), College of Chemistry, Sichuan University, Chengdu

610064, China

E-mail: gangwu@scu.edu.cn

**Table S1** The influence of different KOH form on preparation time

| Solvent system                    | Volume of H <sub>2</sub> O (mL) | Mass of KOH (g) | KOH form        | Volume of DMSO (mL) | Concentration of ANFs (wt%) | Preparation time |
|-----------------------------------|---------------------------------|-----------------|-----------------|---------------------|-----------------------------|------------------|
| KOH/<br>DMSO                      | 0                               | 0.15            | Untreated flake | 50                  | 0.2                         | 6 days           |
|                                   | 0                               | 0.15            | Ground powder   | 50                  | 0.2                         | 16 h             |
| KOH/<br>H <sub>2</sub> O/<br>DMSO | 2                               | 0.15            | Untreated flake | 50                  | 0.2                         | 4 h              |
|                                   | 2                               | 0.15            | Ground powder   | 50                  | 0.2                         | 1 h              |

Reaction conditions: KOH was ground then passed through a sieve with 50 mesh. KOH was fully dried at 100 °C before used. DMSO was used as received. The order of adding KOH, H<sub>2</sub>O, aramid fibers into DMSO has no significant effect on the preparation time in KOH/H<sub>2</sub>O/DMSO.

**Table S2** Different volume ratios of H<sub>2</sub>O to DMSO

| Volume of H <sub>2</sub> O (mL) | H <sub>2</sub> O:DMSO (mL:mL) | Mass of KOH (g) | Concentration of KOH in H <sub>2</sub> O (g mL <sup>-1</sup> ) | Volume of DMSO (mL) | Concentration of ANFs (wt%) |
|---------------------------------|-------------------------------|-----------------|----------------------------------------------------------------|---------------------|-----------------------------|
| 0.25                            | 1:200                         | 0.15            | 0.6                                                            | 50                  | 0.2                         |
| 0.5                             | 1:100                         | 0.15            | 0.3                                                            | 50                  | 0.2                         |
| 1                               | 1:50                          | 0.15            | 0.15                                                           | 50                  | 0.2                         |
| 1.5                             | 3:100                         | 0.15            | 0.1                                                            | 50                  | 0.2                         |
| 2                               | 1:25                          | 0.15            | 0.075                                                          | 50                  | 0.2                         |
| 2.5                             | 1:20                          | 0.15            | 0.06                                                           | 50                  | 0.2                         |
| 3                               | 3:50                          | 0.15            | 0.05                                                           | 50                  | 0.2                         |
| 4                               | 2:25                          | 0.15            | 0.0375                                                         | 50                  | 0.2                         |
| 5                               | 1:10                          | 0.15            | 0.03                                                           | 50                  | 0.2                         |

The amount of KOH remains constant throughout the system. All reactions are carried out in a 100 mL flask at room temperature.

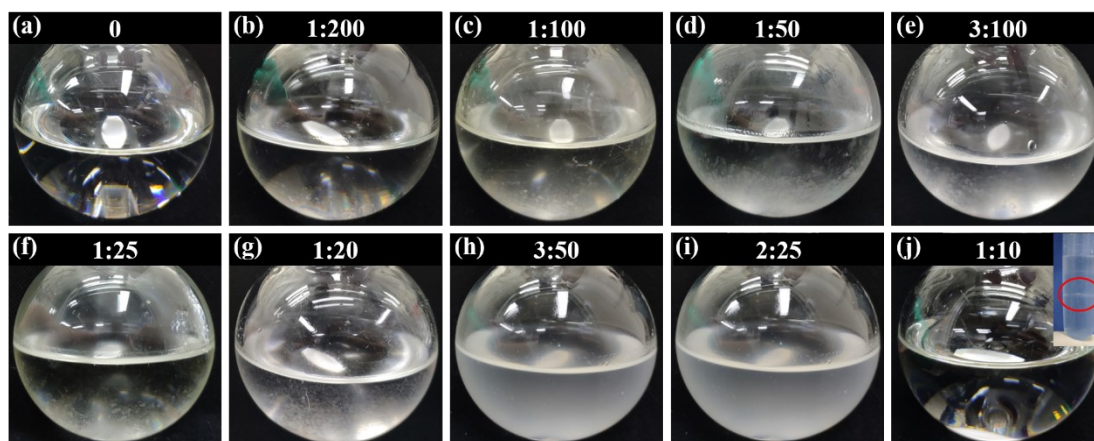

**Fig. S1** Digital photo of KOH(aq)/DMSO system with different volume ratios of H<sub>2</sub>O to DMSO. The KOH solution and DMSO formed an emulsion when the ratio was further increased to 3:50 and 2:25. The KOH solution and DMSO stratified when the ratio was further increased to 1:10. The illustration in (j) is a digital photo of the zoom-in experiment at this scale.

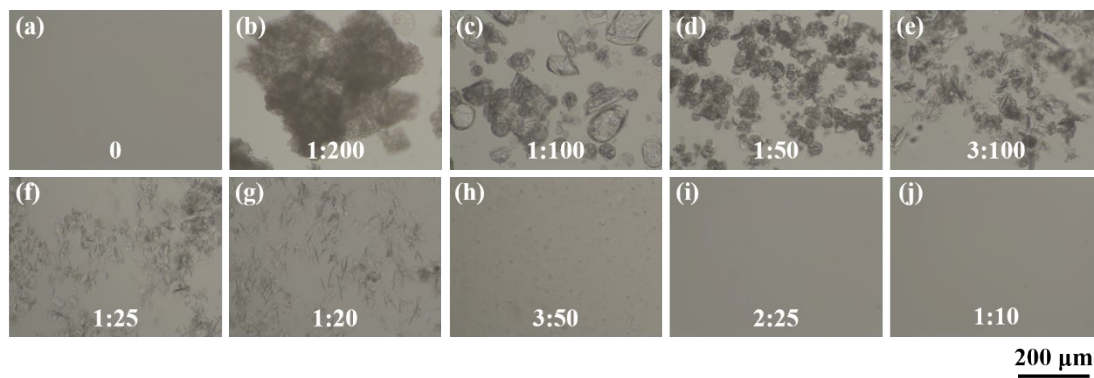

**Fig. S2** Photos of KOH precipitate with different volume ratios of H<sub>2</sub>O to DMSO, which observed under optical microscope.

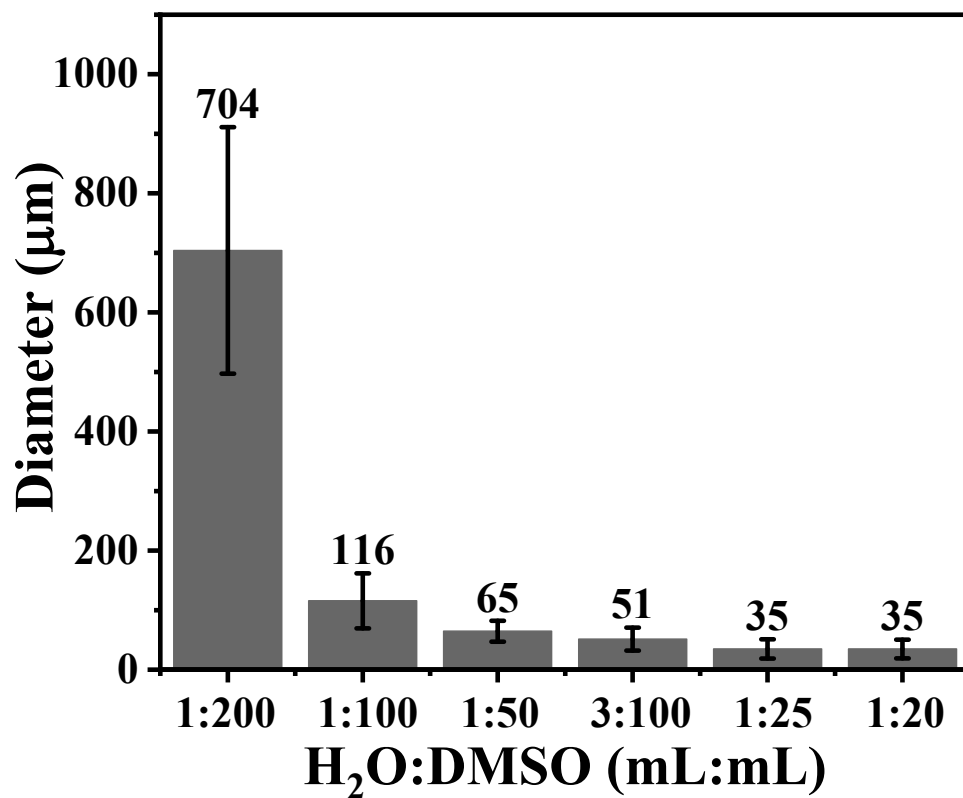

**Fig. S3** The diameter statistics of KOH precipitate with different volume ratios of H<sub>2</sub>O to DMSO.

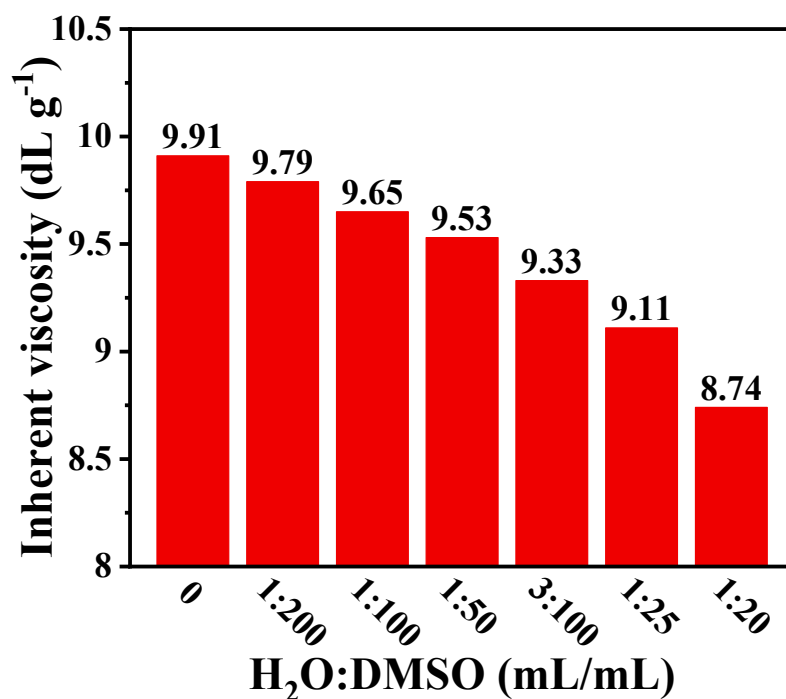

**Fig. S4** Inherent viscosity of ANFs with different volume ratios of H<sub>2</sub>O to DMSO.

The inherent viscosity of ANFs/DMSO solution was determined by a Ubbelohde viscometer. The capillary tube diameter was 0.6-0.7 mm, and the temperature of the water bath was  $30 \pm 0.1$  °C

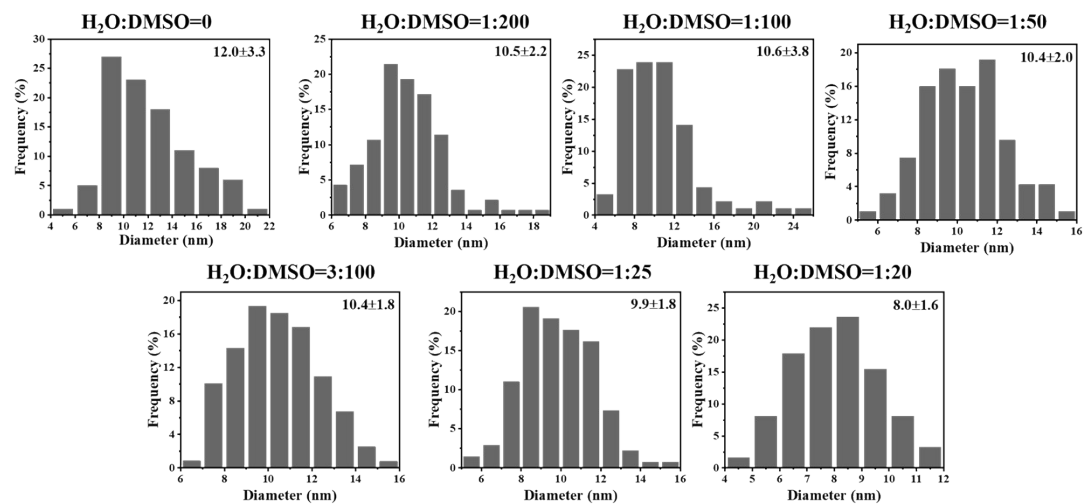

**Fig. S5** The diameter distribution for ANFs dispersions with different volume ratios of H<sub>2</sub>O to DMSO



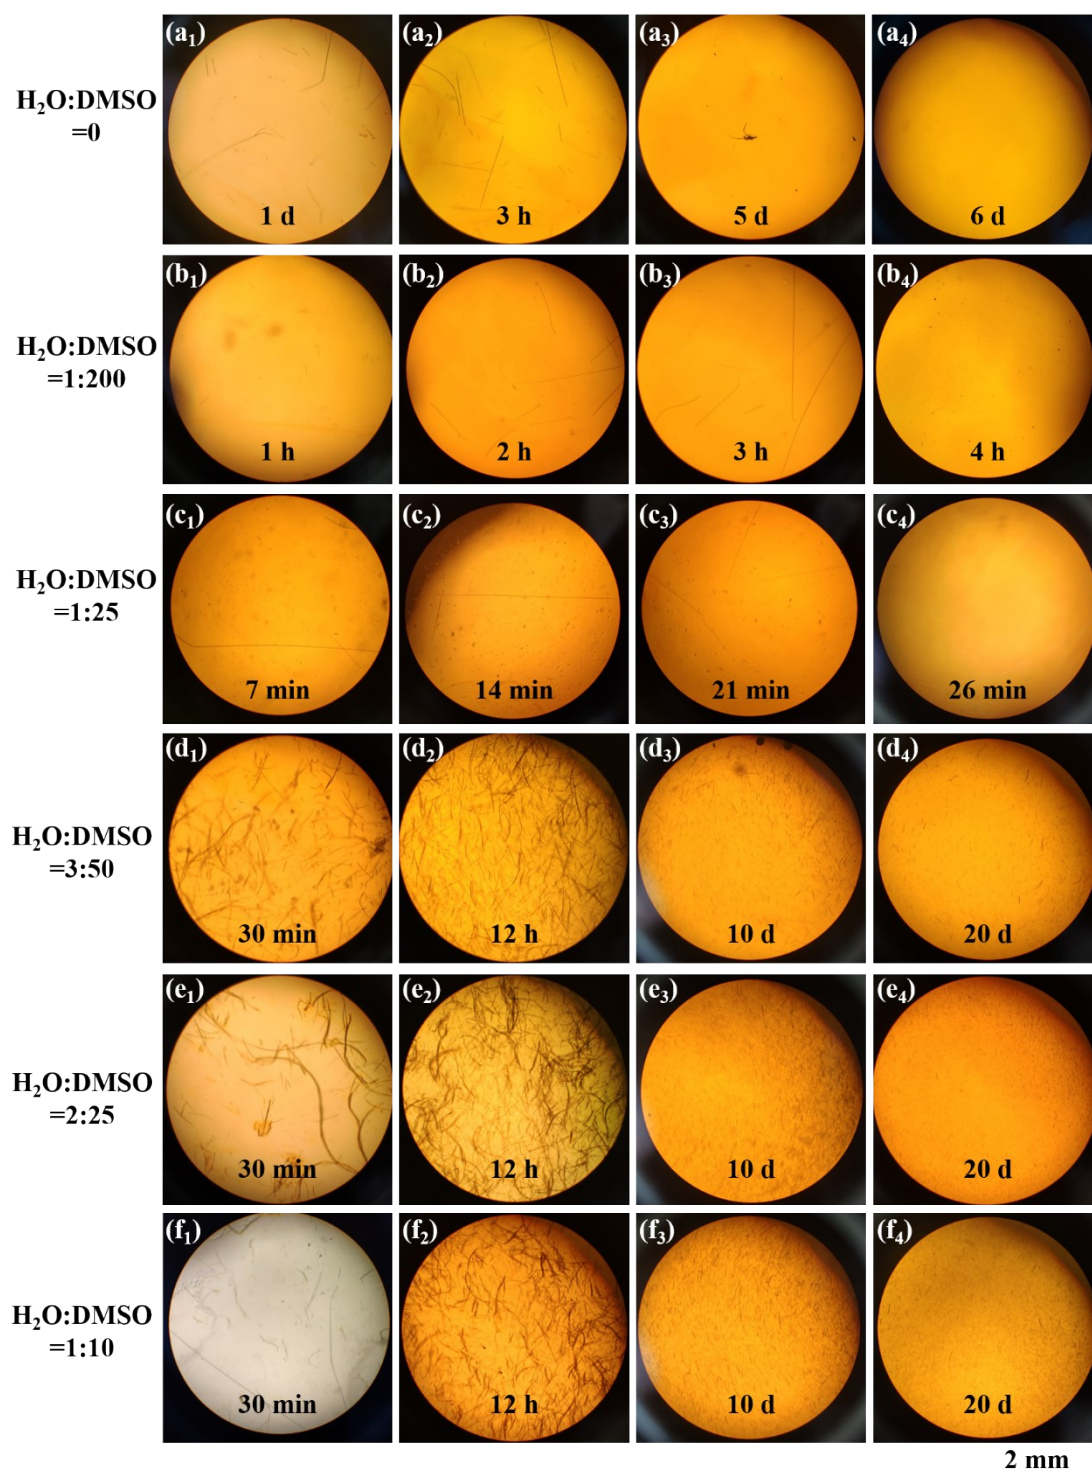

**Fig. S6** Digital photos during ANFs formation which observed under optical microscope. When the volume ratio of H<sub>2</sub>O to DMSO was 3:50, 2:25 and 1:10, macroscopic aramid fibers can still visible in the system even after 20 days

**Table S3.** Different mass ratios of KOH to aramid fibers

| Volume of H <sub>2</sub> O (mL) | Mass of KOH (g) | KOH:Aramid fibers (g:g) | Concentration of KOH in H <sub>2</sub> O (g mL <sup>-1</sup> ) | Volume of DMSO (mL) | Concentration of ANFs (wt %) |
|---------------------------------|-----------------|-------------------------|----------------------------------------------------------------|---------------------|------------------------------|
| 2                               | 0.06            | 3:5                     | 0.03                                                           | 50                  | 0.2                          |
| 2                               | 0.075           | 3:4                     | 0.0375                                                         | 50                  | 0.2                          |
| 2                               | 0.1             | 1:1                     | 0.05                                                           | 50                  | 0.2                          |
| 2                               | 0.15            | 3:2                     | 0.075                                                          | 50                  | 0.2                          |
| 2                               | 0.3             | 3:1                     | 0.15                                                           | 50                  | 0.2                          |
| 2                               | 0.6             | 6:1                     | 0.3                                                            | 50                  | 0.2                          |
| 2                               | 0.8             | 8:1                     | 0.4                                                            | 50                  | 0.2                          |
| 2                               | 1               | 10:1                    | 0.5                                                            | 50                  | 0.2                          |
| 2                               | 1.2             | 12:1                    | 0.6                                                            | 50                  | 0.2                          |

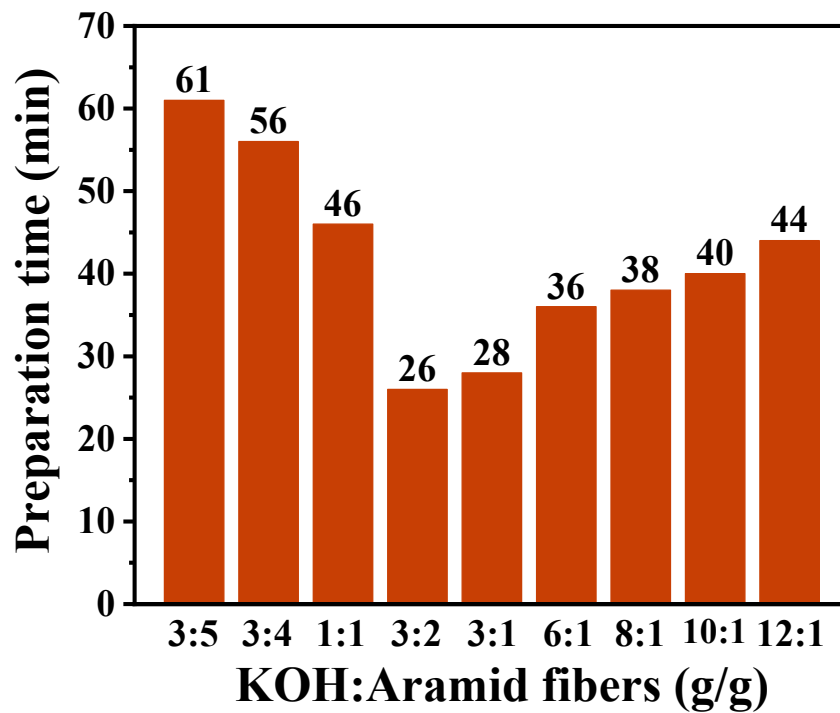

**Fig. S7** Preparation times of ANFs with different mass ratios of KOH to aramid fibers

**Table S4** Summary of ANFs preparation methods

| Preparation Method |                                                                 | Product Forms                     | Diameter of ANFs  | Energy Consumption | Operability | Preparation time (Concentration)         | Ref.             |
|--------------------|-----------------------------------------------------------------|-----------------------------------|-------------------|--------------------|-------------|------------------------------------------|------------------|
| Bottom-up strategy | Polymerization induced self-assembly                            | ANFs/H <sub>2</sub> O dispersions | ~20-50 nm         | Low                | Low         | n.a. (3 wt%)                             | 1                |
| Top-down strategy  | Electrospinning                                                 | Fibers                            | 275 nm-15 $\mu$ m | High               | Low         | ~4 h (n.a.)                              | 2                |
|                    | Immersion rotary jet-spinning                                   | Fibers                            | 500-1000 nm       | Medium             | Low         | n.a.                                     | 3                |
|                    | Alkaline hydrolysis pretreatment<br>mechanical disintegration   | Precipitate                       | 10-200 nm         | High               | Low         | n.a. (1 wt%)                             | 4                |
|                    | KOH/DMSO (Deprotonation)                                        | ANFs/DMSO dispersions             | 3-30 nm           | Low                | High        | 7 days (0.2 wt%)                         | 5                |
|                    | EtOK/DMSO (Deprotonation)                                       | ANFs/DMSO dispersions             | 2-9 nm            | Low                | High        | 7 days (1 wt%)                           | 6                |
|                    | t-BuOK/DMSO (Deprotonation)                                     | ANFs/DMSO dispersions             | ~9-18 nm          | Low                | High        | 7 days (0.5 wt%)                         | 7                |
|                    | t-BuOK/MeOH/DMSO (Proton donor-assisted deprotonation)          | ANFs/DMSO dispersions             | ~3-14 nm          | Low                | Medium      | n.a. (10 wt%)                            | 8                |
|                    | Fibrillation pretreatments<br>deprotonation                     | ANFs/DMSO dispersions             | 12-17 nm          | High               | Low         | 3 days (0.2 wt%)                         | 9                |
|                    | Ultrasonication pretreatments<br>deprotonation                  | ANFs/DMSO dispersions             | 10-14 nm          | Medium             | Medium      | 24 h (0.2 wt%)                           |                  |
|                    | KOH/H <sub>2</sub> O/DMSO (Proton donor-assisted deprotonation) | ANFs/DMSO dispersions             | 10-12 nm          | Low                | High        | 4 h (0.2 wt%)<br>12 h (4 wt%)            |                  |
|                    | <b>KOH(aq)/DMSO</b>                                             | <b>ANFs/DMSO dispersions</b>      | <b>8-12 nm</b>    | <b>Low</b>         | <b>High</b> | <b>26 min (0.2 wt%)<br/>10 h (4 wt%)</b> | <b>This work</b> |

**Table S5** Wavenumbers and vibration types of aramid fibers and ANFs in Raman scattering.

| Aramid fibers $\nu$ , (cm <sup>-1</sup> ) | Assignment                                                        | ANFs $\nu$ (cm <sup>-1</sup> ) |
|-------------------------------------------|-------------------------------------------------------------------|--------------------------------|
| 627                                       | Ring vibrations                                                   | disappear                      |
| 729                                       | Ring vibrations                                                   | disappear                      |
| 785                                       | Ring vibrations                                                   | disappear                      |
| 843                                       | C-H out-of-plane bending                                          | 839                            |
| 1099                                      | C-H in plane bending                                              | 1093                           |
| 1180                                      | C-C ring stretching                                               | 1155                           |
| 1277                                      | C-C ring stretching                                               | 1261                           |
| 1327                                      | C-C ring stretching                                               | 1352                           |
| 1516                                      | C-C ring stretching                                               | 1529                           |
| 1568                                      | Amide II (60% N-H bending, 40% C-N stretching)                    | 1574                           |
| 1608                                      | C-C ring stretching                                               | 1597                           |
| 1647                                      | Amide I (80% C=O stretching, 10% N-H bending, 10% C-N stretching) | disappear                      |

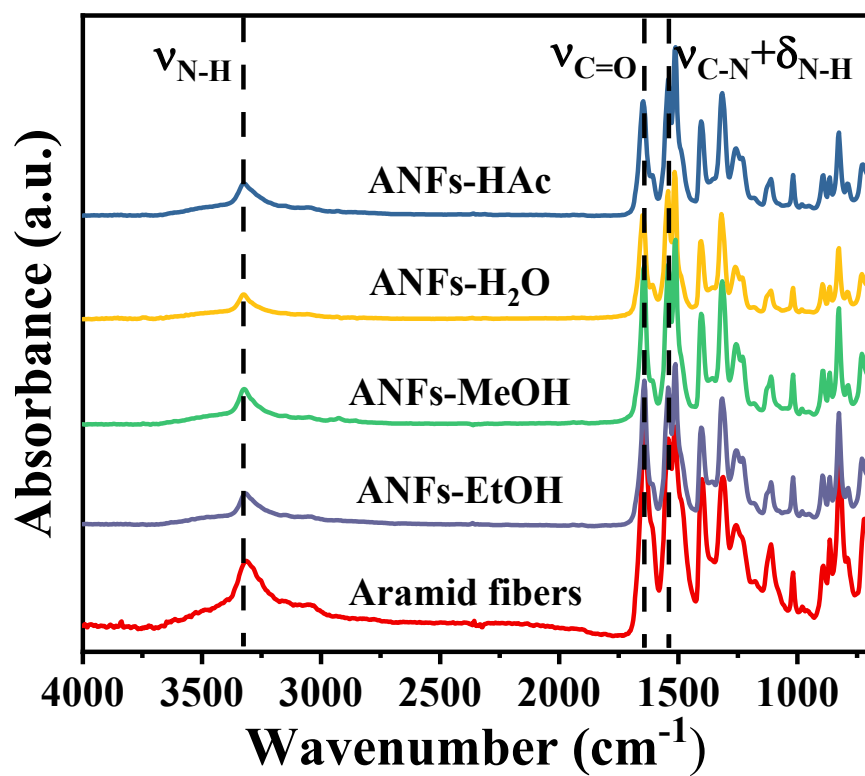

**Fig. S8** FT-IR spectra of ANFs-HAc, ANFs-H<sub>2</sub>O, ANFs-MeOH, ANFs-EtOH aerogel and aramid fibers

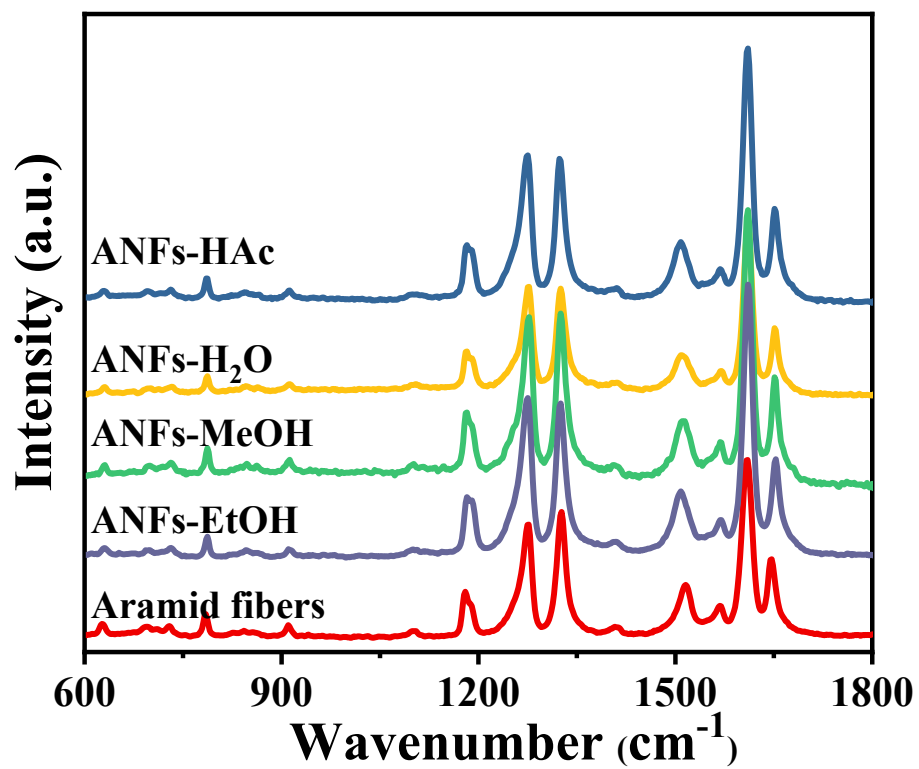

**Fig. S9** Raman scattering of ANFs-HAc, ANFs-H<sub>2</sub>O, ANFs-MeOH, ANFs-EtOH aerogel and aramid fibers

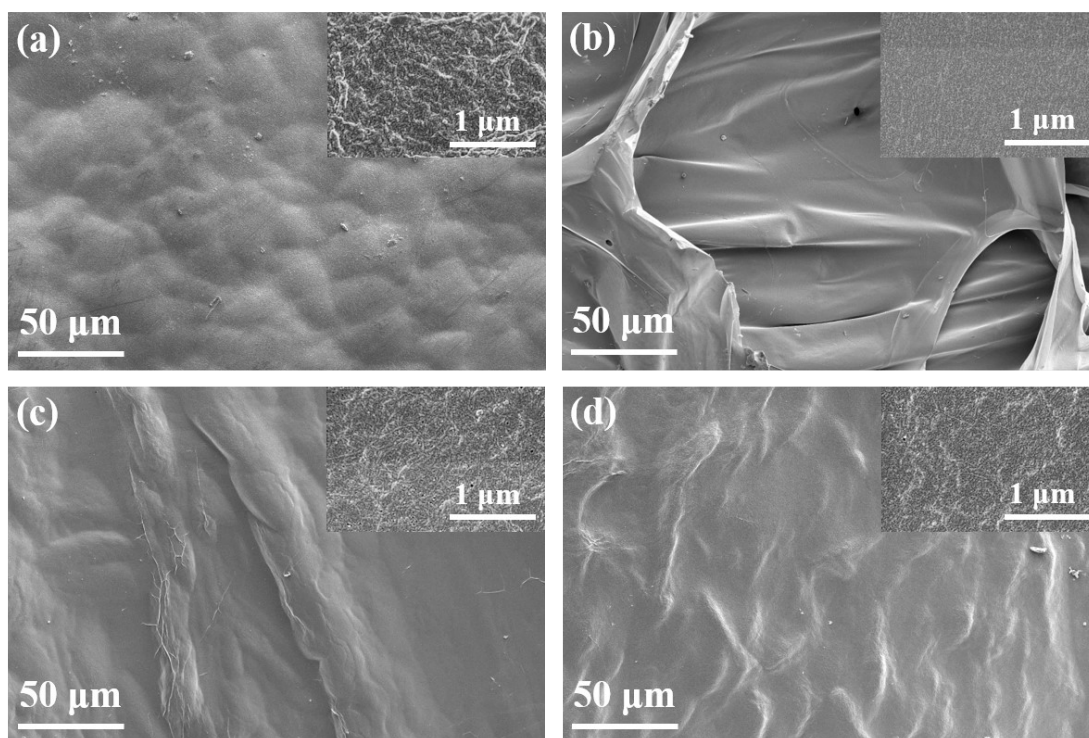

**Fig. S10** SEM images of the upper surface of (a) ANFs-HAc, (b) ANFs-H<sub>2</sub>O, (c) ANFs-MeOH and (d) ANFs-EtOH aerogel



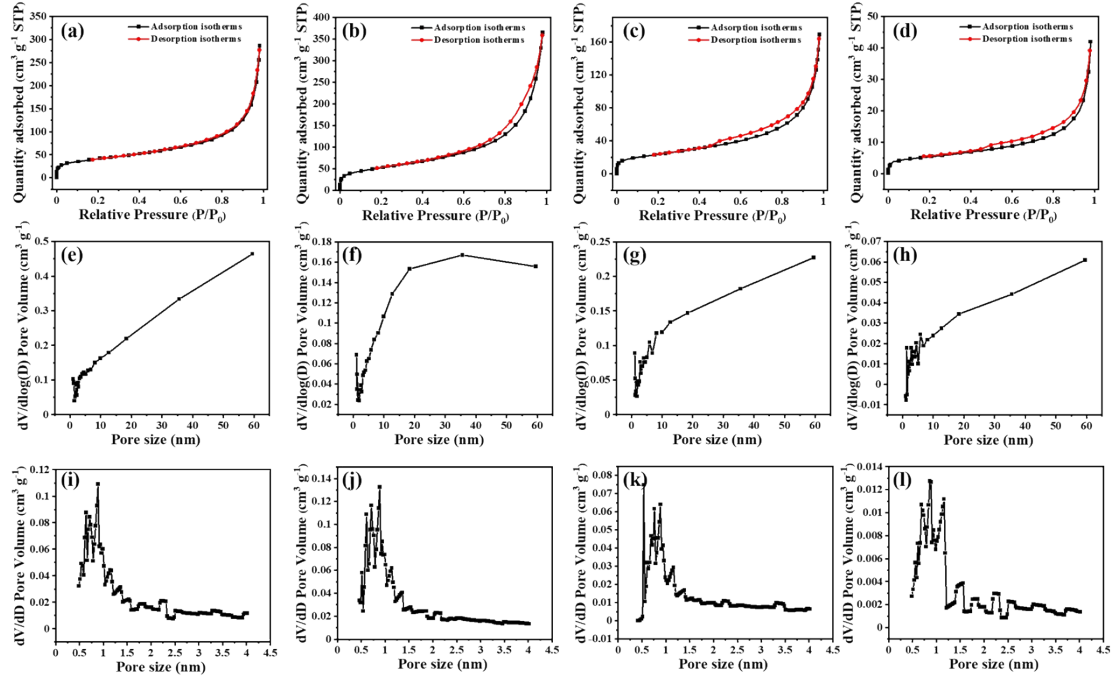

**Fig. S11** (a-d) Nitrogen adsorption-desorption isotherms of ANFs-HAc, ANFs-H<sub>2</sub>O, ANFs-MeOH and ANFs-EtOH aerogel, respectively. (e-h) Pore size distribution of mesopores of ANFs-HAc, ANFs-H<sub>2</sub>O, ANFs-MeOH and ANFs-EtOH aerogel (BJH method), respectively. (i-l) Pore size distribution of micropores of ANFs-HAc, ANFs-H<sub>2</sub>O, ANFs-MeOH and ANFs-EtOH aerogel (SF method), respectively.

**Table S6** Surface area, pore volume and pore size data of ANF aerogels

| Sample                | S <sub>BET</sub> (m <sup>2</sup> /g) | BJH pore volume (cm <sup>3</sup> /g) | SF pore volume (cm <sup>3</sup> /g) | Pore size (nm) |
|-----------------------|--------------------------------------|--------------------------------------|-------------------------------------|----------------|
| ANFs-HAc              | 144.9                                | 0.44                                 | 0.083                               | 6.84           |
| ANFs-H <sub>2</sub> O | 184.8                                | 0.56                                 | 0.107                               | 7.53           |
| ANFs-MeOH             | 85.0                                 | 0.26                                 | 0.049                               | 7.13           |
| ANFs-EtOH             | 18.8                                 | 0.06                                 | 0.011                               | 11.50          |

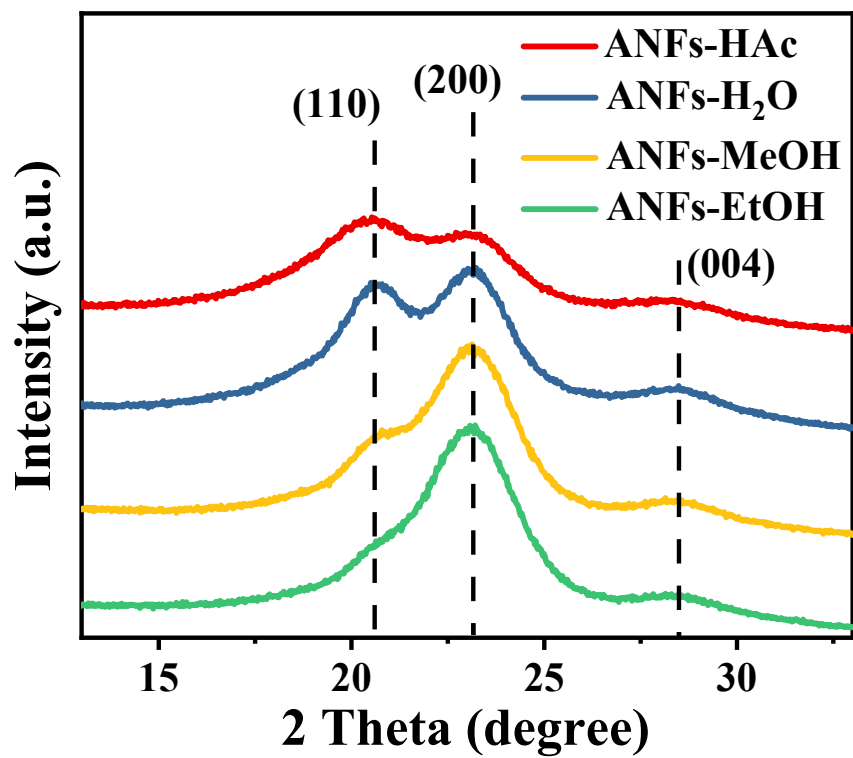

Fig. S12 XRD pattern of ANFs aerogels

**Table S7** TGA-DTG data of aramid fibers and ANFs aerogels

| Sample                | Temperature of<br>10% weight loss,<br>$T_d$ (°C) | Peak<br>decomposition<br>temperature, $T_{max}$<br>(°C) | Residual weight<br>at 700 °C (%) |
|-----------------------|--------------------------------------------------|---------------------------------------------------------|----------------------------------|
| Aramid fibers         | 571.8                                            | 590.1                                                   | 49.2                             |
| ANFs-HAc              | 542.5                                            | 573.1                                                   | 47.5                             |
| ANFs-H <sub>2</sub> O | 538.9                                            | 575.1                                                   | 48.8                             |
| ANFs-MeOH             | 534.0                                            | 572.5                                                   | 46.7                             |
| ANFs-EtOH             | 535.1                                            | 574.5                                                   | 48.2                             |

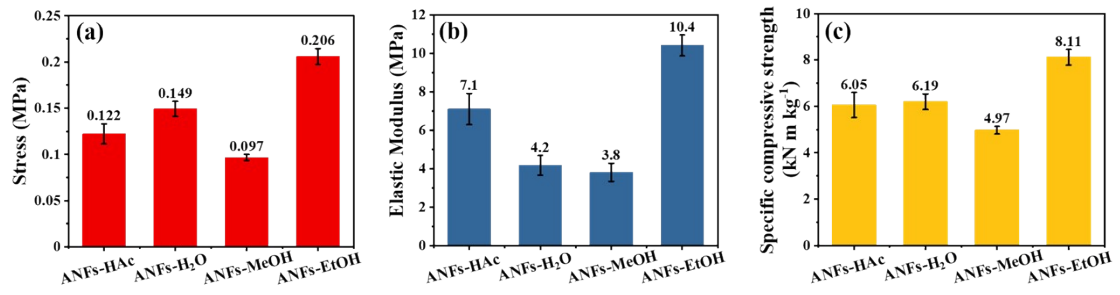

**Fig. S13** (a) Compressive stress ( $\epsilon = 70\%$ ) comparison of ANFs aerogels. (b) Elastic modulus comparison of ANFs aerogels. (c) Specific compressive strength of ANFs aerogels.

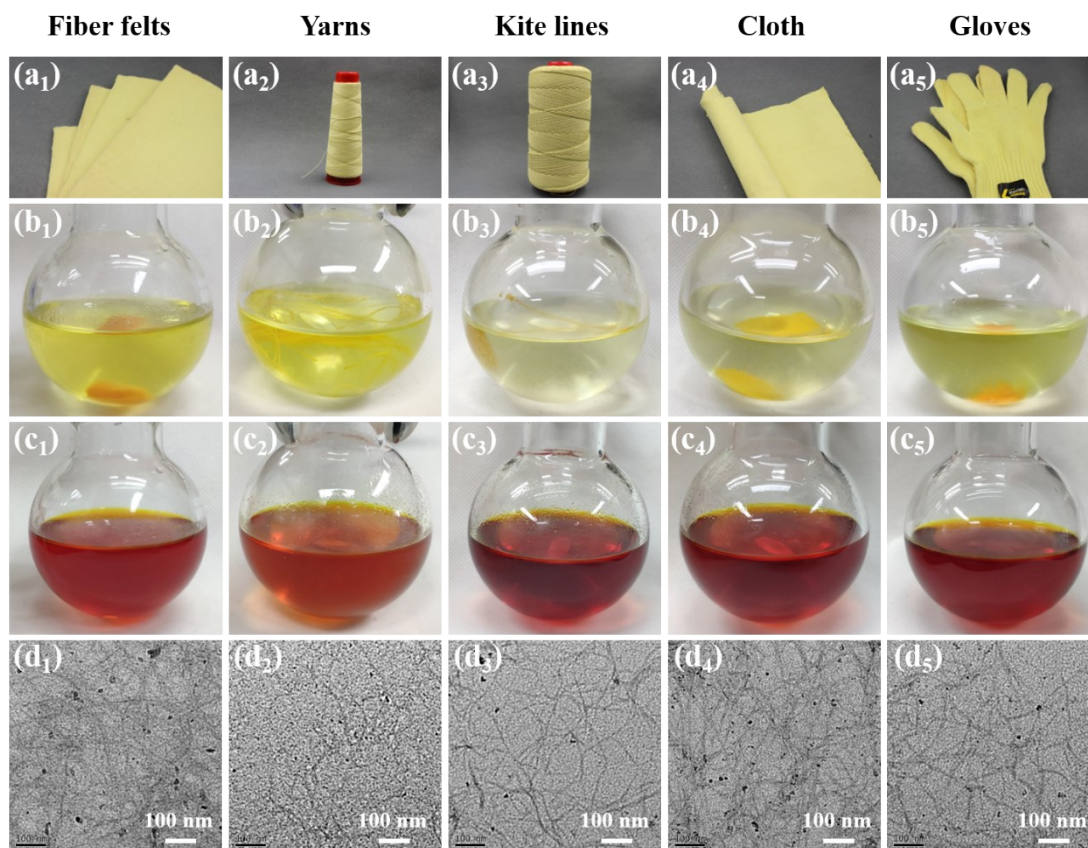

**Fig. S14** (a<sub>1</sub>-a<sub>5</sub>) Digital photos of Kevlar products. (b<sub>1</sub>-c<sub>5</sub>) Digital photos of the deprotonation process in KOH(aq)/DMSO system to obtain 0.2 wt% ANFs dispersions. (d<sub>1</sub>-d<sub>5</sub>) TEM images of ANFs prepared from different aramid products.

## REFERENCES

1. H. Yan, J. Li, W. Tian, L. He, X. Tuo and T. Qiu, *RSC advances*, 2016, **6**, 26599-26605.
2. J. Yao, J. Jin, E. Lepore, N. M. Pugno, C. W. Bastiaansen and T. Peijs, *Macromolecular Materials and Engineering*, 2015, **300**, 1238-1245.
3. G. M. Gonzalez, L. A. MacQueen, J. U. Lind, S. A. Fitzgibbons, C. O. Chantre, I. Huggler, H. M. Golecki, J. A. Goss and K. K. Parker, *Macromolecular Materials and Engineering*, 2017, **302**, 1600365.
4. S. Ifuku, H. Maeta, H. Izawa, M. Morimoto and H. Saimoto, *RSC Advances*, 2014, **4**, 40377-40380.
5. M. Yang, K. Cao, L. Sui, Y. Qi, J. Zhu, A. Waas, E. M. Arruda, J. Kieffer, M. Thouless and N. A. Kotov, *Acs Nano*, 2011, **5**, 6945-6954.
6. J. Zhu, M. Yang, A. Emre, J. H. Bahng, L. Xu, J. Yeom, B. Yeom, Y. Kim, K. Johnson and P. Green, *Angewandte Chemie International Edition*, 2017, **56**, 11744-11748.
7. S. Hu, S. Lin, Y. Tu, J. Hu, Y. Wu, G. Liu, F. Li, F. Yu and T. Jiang, *Journal of Materials Chemistry A*, 2016, **4**, 3513-3526.
8. W. Cao, L. Yang, X. Qi, Y. Hou, J. Zhu and M. Yang, *Advanced Functional Materials*, 2017, **27**, 1701061.
9. B. Yang, L. Wang, M. Zhang, J. Luo and X. Ding, *ACS nano*, 2019, **13**, 7886-7897.
